# Supplementary material for: Identification of Candidate Biomarkers Related to Diagnosis and Prognosis of Thyroid Cancer via Transcriptomic Profile Analysis
Source: Research Square preprint supplement (doi:10.21203/rs.3.rs-92586/v1), 2020-10-19
Supplement: Supplementary file 1 [file b349ff1406f47a6217eda7b8.docx]

**Table S1: Clinical characteristics of patients with TC in GEO.**

| **Variables** | **GSE29265** | **GSE33630** | **GSE60542** | **GSE65144** |
| --- | --- | --- | --- | --- |
| Public date | Jun 01, 2012 | Nov 09, 2012 | Sep 01, 2015 | Jan 22, 2015 |
| Country | Belgium | Belgium | Belgium | USA |
| Platform | GPL570 | GPL570 | GPL570 | GPL570 |
| Sample size, No | 49 | 105 | 67 | 25 |
| Patient size, No | 29 | 60 | 36 | 12 |
| Gender, No(%) |  | NA |  | NA |
| Male | 18(36.7) |  | 26(38.8) |  |
| Female | 22(44.9) |  | 41(61.2) |  |
| NA | 9(18.4) |  |  |  |
| Age at diagnosis, Median (Range) | 31.5(16-68) | NA | NA | NA |
| Type |  |  |  |  |
| Papillary thyroid carcinoma | 20 | 49 | 24 | 0 |
| Anaplastic thyroid carcinoma | 9 | 11 | 0 | 12 |
